# Supplementary material for: Slow Cortical Potential Versus Live Z-score Neurofeedback in Children and Adolescents with ADHD: A Multi-arm Pragmatic Randomized Controlled Trial with Active and Passive Comparators
Source: Res Child Adolesc Psychopathol. 2021 Sep 3;50(4):447–62. doi: 10.1007/s10802-021-00858-1 (PMC8940855; doi:10.1007/s10802-021-00858-1)
Supplement: Supplementary file 1 — Supplementary file1 (DOCX 229 KB) [file 10802_2021_858_MOESM1_ESM.docx]

**Slow Cortical Potential versus Live Z-score neurofeedback in children and adolescents with ADHD: A multi-arm pragmatic randomized controlled trial with active and passive comparators**

John Hasslinger1,2*, Sven Bölte1,2,3 & Ulf Jonsson1,2,4

¹Center of Neurodevelopmental Disorders (KIND), Centre for Psychiatry Research; Department of Women’s and Children’s Health, Karolinska Institutet & Child and Adolescent Psychiatry, Stockholm Health Care Services, Region Stockholm, Stockholm, Sweden.

2Child and Adolescent Psychiatry, Stockholm Health Services, Region Stockholm, Stockholm, Sweden.

3Curtin Autism Research Group, School of Occupational Therapy, Social Work and Speech Pathology, Curtin University, Perth, Western Australia.

4Department of Neuroscience, Child and Adolescent Psychiatry, Uppsala University, Uppsala, Sweden.

* Corresponding author: john.hasslinger@ki.se

| **Supplement Table S1:** Items measuring daily-functioning and impairment, from the Conner’s Rating Scales 3rd edition. | Page 2 |
| --- | --- |
| **Supplement Table S2:** Slow Cortical Potential neurofeedback versus Live Z-score neurofeedback from baseline to posttreatment and 6-month follow-up | Page 2 |
| **Supplement Table S3**: Results of within-group differences baseline to 6-month follow-up. | Page 2 |
| **Supplement Table S4a:** Mean score for teacher-ratings for complete cases per intervention, at baseline, posttreatment and follow-up. | Page 3 |
| **Supplement Table S4b:** Mean score for parent-ratings for complete cases per intervention, at baseline, posttreatment and follow-up. | Page 3 |
| **Supplement Table S4c:** Mean score for self-ratings for complete cases per intervention, at baseline, posttreatment and follow-up. | Page 3 |
| **Supplement Table S5**: Overview of mean differentiation values for of participants last three sessions for feedback trials (mean diff FB) and transfer trials (mean diff TR) for each subject. | Page 4 |
| **Supplement Fig S1:** Self-regulation per session for slow cortical potential neurofeedback. | Page 5 |
| **Supplement Table S6:** Slow Cortical Potential neurofeedback, learners versus non-learners from baseline to posttreatment and 6-month follow-up | Page 5 |
| **Supplement Table S7:** Results for blindness questionnaire for teachers. sorted per intervention. | Page 6 |
| **Supplement Table S8:** Summary of all Adverse Events. according to Pediatric Side Effects Checklist. that increased from baseline to at least problematic. sorted per treatment group. | Page 6 |

| **Supplement Table S1** Items measuring daily-functioning and impairment, from the Conners Rating Scales 3rd edition. | | |
| --- | --- | --- |
| **Rater** | **Item** | **Question** |
| Parent | 106. | Your child’s problems negatively affect schoolwork and grades. |
| Parent | 107. | Your child’s problems negatively affect friend- and family relations. |
| Parent | 108. | Your child’s problems negatively affect the domestic life. |
| Teacher | 112. | The student’s problems negatively affect schoolwork and grades. |
| Teacher | 113. | The student’s problems negatively affect friend- and family relations. |
| Self | 95. | My problems make school really difficult for me. |
| Self | 96. | My problems make it difficult for me to get friends. |
| Self | 97. | My problems make it really difficult for me at home. |
| **Note.** Each item is answered on a 4-point Likert scale, and scored 0-3 per item. | | |

| **Supplement Table S2** Slow Cortical Potential neurofeedback versus Live Z-score neurofeedback from baseline to posttreatment and 6-month follow-up | | | | | | |
| --- | --- | --- | --- | --- | --- | --- |
|  | Posttreatment | | | 6-month follow-up | | |
| Measure (Rater) | Group difference in change score  (95% CI) | Sig. | Cohen’s d | Group difference in change score  (95% CI) | Sig. | Cohen’s d |
| IN-C3 (T) | 0.68 (-1.18 to 2.54) | 0.471 | 0.10 | -0.07 (-2.17 to 2.02) | 0.945 | -0.01 |
| IN-C3 (P) | 1.30 (-0.52 to 3.11) | 0.159 | 0.23 | -0.81 (-3.49 to 1.87) | 0.549 | -0.14 |
| IN-C3 (S) | -0.94 (-3.23 to 1.35) | 0.419 | -0.14 | -0.64 (-3.19 to 1.90) | 0.619 | -0.09 |
| HY-C3 (T) | -1.59 (-4.54 to 1.38) | 0.292 | -0.11 | -5.37 (-10.14 to -0.60) | **0.028*** | **-0.36** |
| HY-C3 (P) | -0.36 (-2.60 to 1.89) | 0.754 | -0.03 | -0.35 (-3.25 to 2.55) | 0.813 | -0.03 |
| HY-C3 (S) | -0.01 (-2.27 to 2.25) | 0.991 | 0.00 | -0.74 (-3.19 to 1.71) | 0.549 | -0.08 |
| ADHD-C3 (T) | -0.71 (-2.26 to 0.85) | 0.367 | -0.13 | -2.20 (-4.18 to -0.22) | **0.030*** | **-0.41** |
| ADHD-C3 (P) | 0.26 (-1.35 to 1.87) | 0.747 | 0.05 | -0.50 (-2.42 to 1.43) | 0.608 | -0.10 |
| ADHD-C3 (S) | 0.12 (-1.30 to 1.54) | 0.867 | 0.03 | -0.06 (-1.45 to 1.34) | 0.935 | -0.02 |
| MI-BRIEF (T) | 2.61 (-2.52 to 7.73) | 0.314 | 0.15 | 1.70 (-7.11 to 10.51) | 0.701 | 0.10 |
| MI-BRIEF (P) | 2.41 (-1.81 to 6.63) | 0.260 | 0.21 | 3.12 (-2.71 to 8.96) | 0.291 | 0.27 |
| BRI-BRIEF (T) | 0.66 (-3.82 to 5.15) | 0.769 | 0.04 | -2.03 (-7.93 to 3.87) | 0.495 | -0.13 |
| BRI-BRIEF (P) | 0.66 (-2.27 to 3.58) | 0.656 | 0.05 | -1.42 (-5.35 to 2.51) | 0.475 | -0.12 |
| HRQoL-index (S) | -1.23 (-3.19 to0.73) | 0.215 | -0.22 | -0.26 (-2.47 to1.95) | 0.814 | -0.05 |
| **Note**: Negative numbers favor Live Z-score.  IN-C3 = Inattention subscale Conners-3; HY-C3 = Hyperactivity subscale Conners-3; ADHD-C3 = ADHD-index Conners-3; MI-BRIEF = Metacognition Index BRIEF; BRI-BRIEF = Behavioral Regulation Index BRIEF; HRQoL-index = Health-Related Quality of Life index from KIDSCREEN-27; T = Teacher; P = Parent; S = Self; * p. <=0.05; ** p.<0.01 | | | | | | |

| **Supplement Table S3** Within-group differences from baseline to 6-month follow-up. | | | | | | | | |
| --- | --- | --- | --- | --- | --- | --- | --- | --- |
| **Slow Cortical Potential** | | | |  | **Live Z-Score** | | | |
| **Measure (Rater)** | **Mean change score**  **(CI 95%)** | **p-value** | **Cohen’s *d*** |  | **Measure** | **Mean change score**  **(CI 95%)** | **p-value** | **Cohen’s *d*** |
| IN-T | 2.24 (0.10 to 4.38) | **0.041** | **0.37** |  | IN-T | 3.02 (1.09 to 4.95) | **0.003** | **0.52** |
| IN-P | 2.41 (0.89 to 3.93) | **0.003** | **0.50** |  | IN-P | 2.50 (0.83 to 4.17) | **0.004** | **0.46** |
| IN-S | 1.80 (-0.22 to 3.81) | 0.08 | 0.27 |  | IN-S | 2.46 (0.58 to 4.34) | **0.012** | **0.39** |
| HY-T | 0.83 (-2.94 to 4.60) | 0.658 | 0.08 |  | HY-T | 6.35 (2.68 to 10.02) | **0.001** | **0.58** |
| HY-P | 1.52 (-0.71 to 3.75) | 0.177 | 0.22 |  | HY-P | 1.98 (-0.11 to 4.06) | 0.062 | 0.29 |
| HY-S | 1.26 (-0.49 to 3.00) | 0.153 | 0.22 |  | HY-S | 2.20 (0.27 to 4.13) | **0.027** | **0.34** |
| ADHD-index-T | 1.32 (-0.28 to 2.93) | 0.104 | 0.29 |  | ADHD-index-T | 3.37 (1.78 to 4.95) | **<0.001** | **0.73** |
| ADHD-index-P | 1.81 (0.48 to 3.14) | **0.009** | **0.43** |  | ADHD-index-P | 2.26 (0.75 to 3.78) | **0.004** | **0.46** |
| ADHD-index-S | 1.21 (0.12 to 2.29) | **0.030** | **0.35** |  | ADHD-index-S | 1.37 (0.26 to 2.47) | **0.016** | **0.38** |
| MI-T | 9.52 (0.91 to 18.13) | **0.032** | **0.47** |  | MI-T | 9.08 (3.65 to14.51) | **0.002** | **0.62** |
| MI-P | 7.74 (3.37 to 12.11) | **0.001** | **0.61** |  | MI-P | 4.65 (-0.35 to 9.65) | 0.067 | 0.31 |
| BRI-T | 3.16 (-0.33 to 6.65) | 0.074 | 0.38 |  | BRI-T | 4.80 (-0.55 to10.16) | 0.077 | 0.32 |
| BRI-P | 1.50 (-1.42 to 4.42) | 0.305 | 0.17 |  | BRI-P | 2.97 (-0.31 to 6.26) | 0.075 | 0.30 |
| HRQoL-index-Sa | -0.56 (-2.43 to 1.32) | 0.551 | -0.09 |  | HRQoL-index-Sa | -1.15 (-2.61 to 0.31) | 0.119 | -0.23 |
| **Working Memory Training** | | | |  | **Treatment-as-Usual** | | | |
| **Measure** | **Mean change score**  **(CI 95%)** | **p-value** | **Cohen’s *d*** |  | **Measure** | **Mean change score**  **(CI 95%)** | **p-value** | **Cohen’s *d*** |
| IN-T | 2.87 (0.72 to 5.02) | **0.010** | **0.43** |  | IN-T | -0.79 (-2.75 to 1.17) | 0.420 | -0.13 |
| IN-P | 2.37 (0.93 to 3.82) | **0.002** | **0.55** |  | IN-P | 1.22 (0.14 to 2.31) | **0.028** | **0.33** |
| IN-S | 2.18 (0.49 to 3.88) | **0.013** | **0.40** |  | IN-S | 0.77 (-0.92 to 2.46) | 0.363 | 0.13 |
| HY-T | 4.47 (1.49 to 7.45) | **0.004** | **0.48** |  | HY-T | -0.56 (-3.27 to 2.15) | 0.677 | -0.07 |
| HY-P | 2.58 (0.41 to 4.74) | **0.021** | **0.39** |  | HY-P | 0.31 (-1.37 to 1.99) | 0.713 | 0.05 |
| HY-S | 0.57 (-1.36 to 2.50) | 0.552 | 0.09 |  | HY-S | 1.43 (0.02 to 2.84) | **0.048** | **0.29** |
| ADHD-index-T | 2.80 (1.06 to 4.54) | **0.002** | **0.55** |  | ADHD-index-T | -0.66 (-2.12 to 0.79) | 0.362 | -0.15 |
| ADHD-index-P | 2.22 (1.07 to 3.37) | **0.000** | **0.63** |  | ADHD-index-P | 0.60 (-0.47 to 1.67) | 0.266 | 0.16 |
| ADHD-index-S | 1.44 (0.53 to 2.36) | **0.003** | **0.50** |  | ADHD-index-S | 0.78 (-0.13 to 1.70) | 0.090 | 0.25 |
| MI-T | 4.38 (-2.21 to 10.98) | 0.185 | 0.25 |  | MI-T | -1.62 (-6.43 to 3.19) | 0.498 | -0.12 |
| MI-P | 3.50 (0.18 to 6.82) | **0.040** | **0.39** |  | MI-P | 1.11 (-1.45 to 3.66) | 0.387 | 0.13 |
| BRI-T | 2.65 (-1.35 to 6.66) | 0.187 | 0.24 |  | BRI-T | -0.99 (-3.96 to 1.99) | 0.505 | -0.12 |
| BRI-P | 3.97 (1.29 to 6.65) | **0.005** | **0.54** |  | BRI-P | 1.39 (-1.02 to 3.79) | 0.253 | 0.17 |
| HRQoL-index-Sa | -0.80 (-2.36 to 0.76) | 0.305 | -0.16 |  | HRQoL-index-Sa | 0.37 (-1.01 to 1.76) | 0.592 | 0.08 |
| **Note**. a Negative number indicates improvement  SCP = Slow Cortical Potential; LZS = Live Z-Score; WMT = Working Memory Training; TAU = Treatment-as-Usual; IN = Inattention scale; HY = Hyperactivity/impulsivity scale; BRI = Behavior Regulation Index; MI = Metacognition Index; HRQoL-index = Health-Related Quality of Life index from KIDSCREEN-27; S = Self; P = Parent; T = Teacher | | | | | | | | |

| **Supplement Table S4a** Mean score for teacher-ratings for complete cases per intervention, at baseline, posttreatment  and follow-up | | | | | | | | | |
| --- | --- | --- | --- | --- | --- | --- | --- | --- | --- |
|  |  | **Slow Cortical**  **Potential** | | **Live Z-Score** | | **Working Memory**  **Training** | | **Treatment as Usual** | |
| **Measure** | **Time** | **Mean (SD)** | **n** | **Mean (SD)** | **n** | **Mean (SD)** | **n** | **Mean (SD)** | **n** |
| **IN-C3** | Baseline | 16.29 (7.34) | 46 | 16.15 (6.98) | 50 | 16.58 (8.48) | 48 | 16.54 (7.69) | 49 |
| **IN-C3** | Post | 14.49 (7.32) | 44 | 15.19 (7.11) | 48 | 14.13 (7.65) | 41 | 16.34 (8.23) | 47 |
| **IN-C3** | FU | 15.93 (7.99) | 37 | 13.87 (7.57) | 38 | 13.37 (7.28) | 40 | 16.77 (9.26) | 42 |
| **HY-C3** | Baseline | 15.87 (13.85) | 46 | 19.48 (15.52) | 50 | 20.70 (15.05) | 48 | 18.06 (15.29) | 49 |
| **HY-C3** | Post | 15.15 (13.88) | 44 | 16.65 (13.63) | 48 | 17.29 (14.41) | 41 | 16.86 (15.73) | 47 |
| **HY-C3** | FU | 17.91 (14.71) | 37 | 14.58 (14.44) | 38 | 15.01 (13.48) | 40 | 17.36 (16.14) | 42 |
| **ADHD-C3** | Baseline | 7.14 (5.31) | 46 | 7.39 (5.53) | 47 | 7.42 (6.26) | 45 | 7.73 (5.55) | 49 |
| **ADHD-C3** | Post | 5.88 (5.51) | 41 | 5.24 (4.78) | 42 | 5.12 (5.68) | 40 | 7.75 (5.74) | 44 |
| **ADHD-C3** | FU | 6.56 (5.65) | 36 | 4.67 (4.95) | 38 | 4.61 (4.84) | 38 | 7.77 (6.06) | 40 |
| **MI-BRIEF** | Baseline | 90.96 (17.33) | 40 | 90.82 (16.94) | 44 | 89.21 (20.62) | 41 | 91.26 (20.07) | 45 |
| **MI-BRIEF** | Post | 84.93 (18.81) | 34 | 87.53 (16.76) | 44 | 84.05 (21.38) | 38 | 92.49 (17.86) | 38 |
| **MI-BRIEF** | FU | 83.38 (23.44) | 29 | 83.97 (18.90) | 34 | 80.81 (19.56) | 34 | 93.38 (23.06) | 37 |
| **BRI-BRIEF** | Baseline | 53.19 (13.92) | 43 | 53.04 (16.41) | 45 | 52.38 (16.20) | 44 | 53.57 (15.72) | 45 |
| **BRI-BRIEF** | Post | 51.00 (16.05) | 34 | 50.91 (14.77) | 45 | 50.85 (14.72) | 39 | 52.30 (15.29) | 38 |
| **BRI-BRIEF** | FU | 53.04 (15.06) | 28 | 48.99 (14.17) | 35 | 47.56 (13.63) | 36 | 52.82 (17.14) | 38 |
| **Note**. IN = Inattention scale; HY = Hyperactivity/impulsivity scale; BRI = Behaviour Regulation Index; MI = Metacognition Index; Post = Posttreatment; FU = 6-month Follow-up; n = Number of completed cases | | | | | | | | | |

| **Supplement Table S4b** Mean score for parent-ratings for complete cases per intervention, at baseline, posttreatment  and follow-up | | | | | | | | | |
| --- | --- | --- | --- | --- | --- | --- | --- | --- | --- |
|  |  | **Slow Cortical**  **Potential** | | **Live Z-Score** | | **Working Memory**  **Training** | | **Treatment as Usual** | |
| **Measure** | **Time** | **Mean (SD)** | **n** | **Mean (SD)** | **n** | **Mean (SD)** | **n** | **Mean (SD)** | **n** |
| **IN-C3** | Baseline | 18.57 (5.90) | 51 | 19.44 (5.43) | 49 | 20.07 (6.51) | 50 | 19.68 (5.63) | 49 |
| **IN-C3** | Post | 16.35 (5.97) | 48 | 18.10 (5.29) | 45 | 18.29 (7.61) | 46 | 19.28 (5.35) | 49 |
| **IN-C3** | FU | 16.17 (6.05) | 41 | 17.23 (5.42) | 44 | 16.77 (7.50) | 39 | 18.35 (5.57) | 48 |
| **HY-C3** | Baseline | 17.08 (11.24) | 51 | 18.92 (10.69) | 49 | 20.88 (11.67) | 50 | 16.39 (10.29) | 49 |
| **HY-C3** | Post | 15.47 (10.02) | 48 | 17.30 (10.53) | 45 | 20.02 (11.49) | 45 | 16.42 (10.11) | 49 |
| **HY-C3** | FU | 15.12 (10.88) | 41 | 16.55 (11.22) | 44 | 17.01 (11.85) | 39 | 15.95 (10.51) | 48 |
| **ADHD-C3** | Baseline | 9.69 (5.12) | 51 | 10.56 (4.71) | 50 | 10.85 (5.49) | 50 | 10.14 (4.74) | 49 |
| **ADHD-C3** | Post | 7.83 (4.90) | 48 | 8.95 (4.66) | 45 | 9.74 (5.67) | 45 | 9.73 (4.68) | 49 |
| **ADHD-C3** | FU | 7.95 (5.11) | 41 | 8.46 (5.64) | 44 | 8.21 (5.73) | 39 | 9.39 (5.08) | 47 |
| **MI-BRIEF** | Baseline | 103.50 (11.96) | 51 | 103.17 (11.37) | 50 | 104.20 (17.56) | 48 | 102.61 (13.75) | 49 |
| **MI-BRIEF** | Post | 98.78 (14.59) | 45 | 100.71 (12.67) | 45 | 101.75 (19.05) | 40 | 103.34 (13.78) | 48 |
| **MI-BRIEF** | FU | 95.37 (16.57) | 38 | 99.47 (13.85) | 37 | 98.25 (18.89) | 32 | 101.53 (14.73) | 47 |
| **BRI-BRIEF** | Baseline | 57.07 (12.32) | 51 | 53.35 (12.29) | 50 | 58.49 (13.71) | 49 | 54.46 (9.97) | 49 |
| **BRI-BRIEF** | Post | 55.80 (13.55) | 46 | 52.34 (13.07) | 45 | 55.89 (14.16) | 40 | 54.47 (11.57) | 48 |
| **BRI-BRIEF** | FU | 55.47 (14.18) | 38 | 51.91 (11.80) | 37 | 51.84 (13.51) | 32 | 53.15 (12.15) | 48 |
| **Note**. IN = Inattention scale; HY = Hyperactivity/impulsivity scale; BRI = Behaviour Regulation Index; MI = Metacognition Index; Post = Posttreatment; FU = 6-month Follow-up; n = Number of completed cases | | | | | | | | | |

| **Supplement Table S4c** Mean score for self-ratings for complete cases per intervention, for baseline, posttreatment  and follow-up | | | | | | | | | |
| --- | --- | --- | --- | --- | --- | --- | --- | --- | --- |
|  |  | **Slow Cortical**  **Potential** | | **Live Z-Score** | | **Working Memory**  **Training** | | **Treatment as Usual** | |
| **Measure** | **Time** | **Mean (SD)** | **n** | **Mean (SD)** | **n** | **Mean (SD)** | **n** | **Mean (SD)** | **n** |
| **IN-C3** | Baseline | 16.75 (7.33) | 51 | 15.42 (6.56) | 50 | 16.17 (7.31) | 51 | 15.10 (6.96) | 49 |
| **IN-C3** | Post | 15.62 (6.96) | 49 | 13.38 (6.22) | 48 | 15.26 (6.22) | 47 | 14.72 (6.46) | 48 |
| **IN-C3** | FU | 14.42 (6.62) | 44 | 13.04 (5.80) | 46 | 12.86 (6.21) | 42 | 14.57 (7.45) | 49 |
| **HY-C3** | Baseline | 16.36 (9.69) | 51 | 16.02 (8.43) | 50 | 16.99 (9.06) | 51 | 15.08 (7.32) | 49 |
| **HY-C3** | Post | 14.99 (9.94) | 49 | 14.43 (7.07) | 47 | 15.77 (8.75) | 47 | 13.76 (8.34) | 48 |
| **HY-C3** | FU | 14.41 (8.50) | 44 | 13.63 (7.62) | 46 | 15.27 (8.08) | 42 | 13.38 (7.60) | 49 |
| **ADHD-C3** | Baseline | 4.79 (3.97) | 51 | 4.08 (3.73) | 50 | 5.00 (4.04) | 51 | 4.40 (3.49) | 49 |
| **ADHD-C3** | Post | 3.91 (3.99) | 47 | 3.27 (3.53) | 44 | 4.06 (3.31) | 47 | 4.30 (3.59) | 47 |
| **ADHD-C3** | FU | 3.07 (3.40) | 41 | 2.76 (2.63) | 46 | 3.12 (2.71) | 42 | 3.73 (3.90) | 49 |
| **HRQoL-index** | Baseline | 39.06 (5.92) | 50 | 39.52 (5.46) | 50 | 38.96 (5.98) | 50 | 38.44 (5.35) | 48 |
| **HRQoL-index** | Post | 38.90 (5.82) | 49 | 40.58 (5.07) | 48 | 38.98 (6.35) | 46 | 38.55 (5.77) | 49 |
| **HRQoL-index** | FU | 40.32 (5.26) | 44 | 40.33 (5.14) | 46 | 39.46 (5.68) | 41 | 38.03 (6.06) | 49 |
| **Note**. IN = Inattention scale; HY = Hyperactivity/impulsivity scale; BRI = Behaviour Regulation Index; MI = Metacognition Index; HRQoL-index = Health-Related Quality of Life index from KIDSCREEN-27; Post = Posttreatment;  FU = 6-month Follow-up; n = Number of completed cases | | | | | | | | | |

| **Supplement Table S5** Overview of mean differentiation values for of participants last three sessions for feedback trials (mean diff FB) and transfer trials (mean diff TR) for each subject. | | | | | |
| --- | --- | --- | --- | --- | --- |
| **Subject** | **Mean Diff FB**  (in µV) | **Mean Diff TR**  (in µV) | **Subject** | **Mean Diff FB**  (in µV) | **Mean Diff TR**  (in µV) |
| **1** | 59,28 | 45,23 | **26*** | 24,60 | 16,78 |
| **2*** | 86,42 | 42,05 | **27** | -9,80 | 24,63 |
| **3** | 33,39 | 24,60 | **28** | 38,95 | 48,04 |
| **4** | -5,45 | -5,22 | **29** | 23,77 | 19,62 |
| **5** | 24,13 | -13,58 | **30** | -0,05 | 2,53 |
| **6** | 20,73 | -4,73 | **31** | -11,76 | -24,78 |
| **7** | 8,27 | -25,42 | **32** | 18,73 | -2,23 |
| **8** | 2,26 | -4,27 | **33*** | 12,45 | 31,30 |
| **9** | 8,18 | 0,38 | **34*** | 9,07 | 4,56 |
| **10** | -0,39 | -2,77 | **35** | 4,32 | -13,25 |
| **11*** | 44,16 | 36,57 | **36** | 19,76 | 3,93 |
| **12*** | -5,34 | 24,74 | **37** | -1,10 | -7,40 |
| **13*,¤** | 118,14 | 190,29 | **38** | 10,45 | 0,43 |
| **14*** | 54,10 | 11,25 | **39** | -2,71 | 3,20 |
| **15** | 9,79 | -2,75 | **40** | 21,38 | -15,01 |
| **16** | -8,02 | 20,87 | **41** | -11,77 | -6,75 |
| **17*** | 30,70 | 36,76 | **42** | 2,53 | -11,80 |
| **18** | 65,31 | 43,13 | **43** | 23,52 | 19,14 |
| **19** | -21,41 | 3,62 | **44*** | 36,04 | 42,50 |
| **20*** | 28,32 | 27,38 | **45** | -2,68 | 18,50 |
| **21** | -11,65 | 3,24 | **46** | -8,85 | 2,10 |
| **22** | -9,01 | -8,92 | **47** | 7,27 | 1,88 |
| **23*** | -1,78 | 11,73 | **48** | -8,01 | -7,82 |
| **24** | -0,06 | 2,61 | **49** | 14,99 | -10,87 |
| **25** | 17,09 | 1,89 | **Total** | 16,60 | 12,52 |
|  |  |  |  |  |  |
| *Positive value indicates correct differentiation as intended, while a negative value indicated differentiation in the opposite direction.*  **Note:*** = learners; ¤ = outlier | | | | | |
| 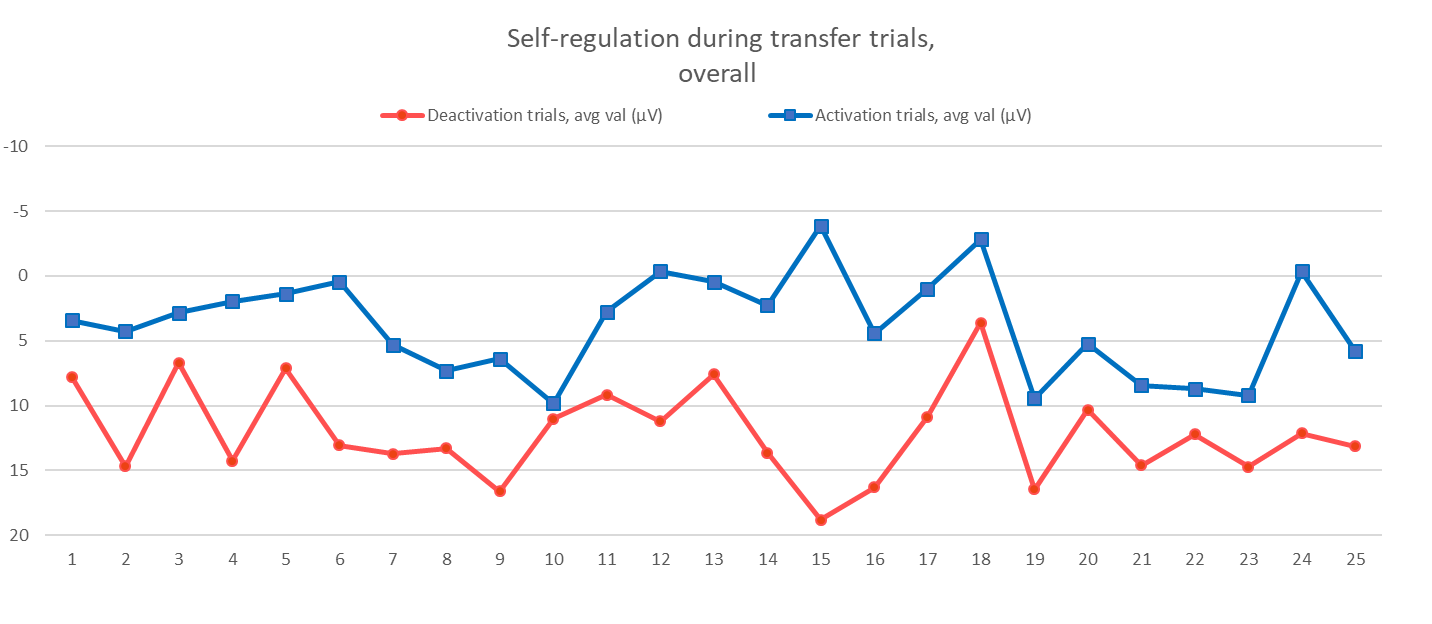 | | | | | |
| 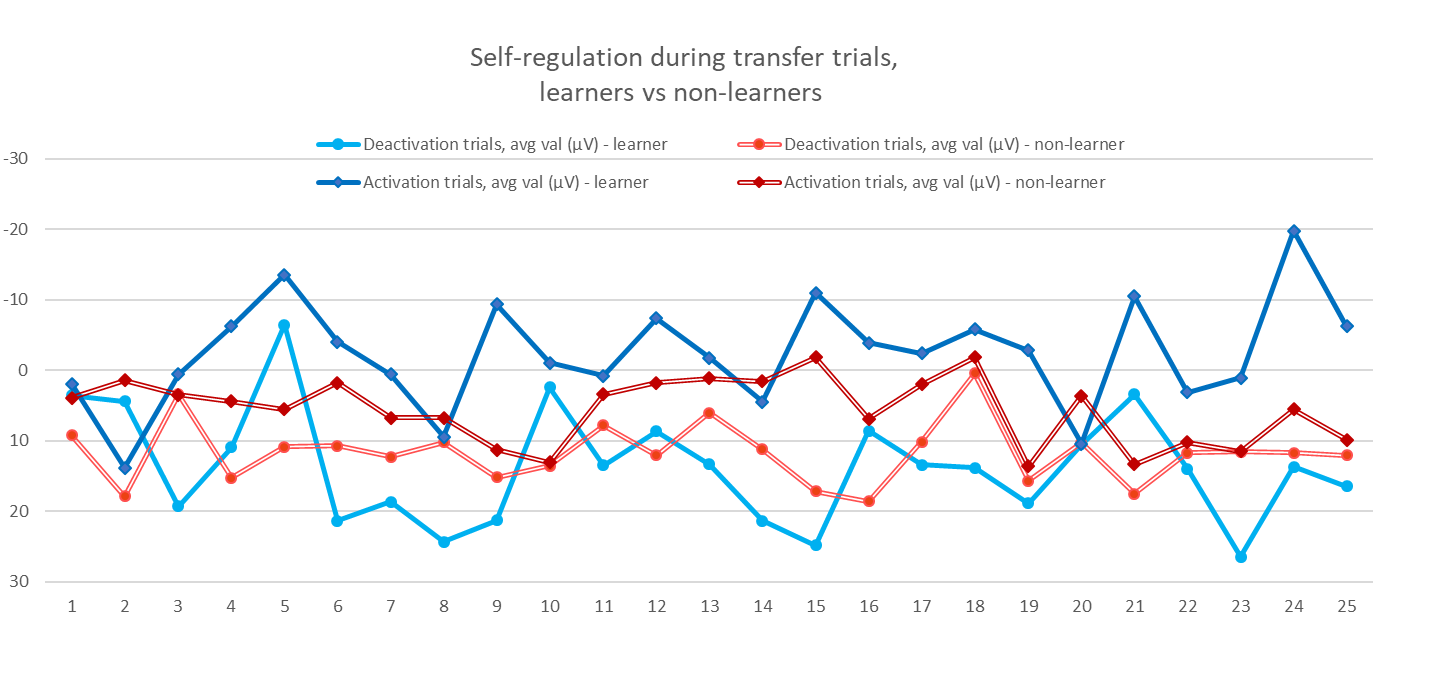 | | | | | |
| **Supplement Fig. S1** Self-regulation per session for slow cortical potential neurofeedback.  The top graph shows the average self-regulation during SCP transfer trials, for all participants per session. The lower graph illustrates the differences in self-regulation during SCP transfer trials, per session, between learners and non-learners. Participant 13 (outlier) is not included in the graphs. | | | | | |

| **Supplement Table S6** Slow Cortical Potential neurofeedback, learners versus non-learners from baseline to posttreatment and 6-month follow-up | | | | | | |
| --- | --- | --- | --- | --- | --- | --- |
|  | **Posttreatment** | | | **6-month follow-up** | | |
| **Measure (Rater)** | **Group difference in change score**  **(95% CI)** | **Sig.** | **Cohen’s d** | **Group difference in change score**  **(95% CI)** | **Sig.** | **Cohen’s d** |
| IN-C3 (T) | 2.68 (-0.61 to 5.97) | 0.108 | 0.38 | 4.20 (-0.14 to 8.53) | 0.057 | 0.59 |
| IN-C3 (P) | 0.43 (-2.68 to 3.55) | 0.782 | 0.07 | -1.42 (-4.77 to 1.92) | 0.398 | -0.24 |
| IN-C3 (S) | 1.11 (-2.41 to 4.62) | 0.529 | 0.16 | 1.05 (-3.19 to 5.28) | 0.622 | 0.15 |
| HY-C3 (T) | 2.03 (-3.26 to 7.32) | 0.442 | 0.15 | 0.80 (-6.32 to 7.93) | 0.822 | 0.06 |
| HY-C3 (P) | 0.47 (-3.05 to 3.99) | 0.790 | 0.04 | -0.92 (-5.86 to 4.02) | 0.710 | -0.08 |
| HY-C3 (S) | 2.60 (-0.70 to 5.90) | 0.119 | 0.27 | 2.66 (-1.03 to 6.35) | 0.155 | 0.28 |
| ADHD-C3 (T) | 1.80 (-0.51 to 4.10) | 0.123 | 0.34 | 1.03 (-2.30 to 4.35) | 0.536 | 0.19 |
| ADHD-C3 (P) | 1.75 (-0.91 to 4.41) | 0.192 | 0.35 | -0.69 (-3.64 to 2.27) | 0.643 | -0.14 |
| ADHD-C3 (S) | -1.14 (-3.27 to 0.99) | 0.285 | -0.29 | -0.69 (-2.98 to 1.60) | 0.550 | -0.18 |
| MI-BRIEF (T) | 11.03 (1.17 to 20.88) | 0.029* | 0.69 | -1.10 (-19.56 to 17.35) | 0.904 | -0.07 |
| MI-BRIEF (P) | 4.30 (-3.63 to 12.23) | 0.282 | 0.36 | 2.40 (-7.24 to 12.05) | 0.618 | 0.20 |
| BRI-BRIEF (T) | 7.93 (0.73 to 15.13) | 0.032* | 0.57 | -0.79 (-8.64 to 7.06) | 0.838 | -0.06 |
| BRI-BRIEF (P) | -1.11 (-6.09 to 3.86) | 0.655 | -0.09 | -0.73 (-7.19 to 5.73) | 0.820 | -0.06 |
| HRQoL-index (S) | -0.71 (-4.30 to 2.89) | 0.693 | -0.12 | 1.06 (-2.96 to 5.08) | 0.599 | 0.18 |
| **Note**: Positive numbers favor learners.  IN-C3 = Inattention subscale Conners-3; HY-C3 = Hyperactivity subscale Conners-3; ADHD-C3 = ADHD-index Conners-3; MI-BRIEF = Metacognition Index BRIEF; BRI-BRIEF = Behavioral Regulation Index BRIEF; HRQoL-index = Health-Related Quality of Life index from KIDSCREEN-27; T = Teacher; P = Parent; S = Self; * p. <=0.05 | | | | | | |

| **Supplement Table S7** Results for blindness questionnaire for teachers, sorted per intervention | | | | |
| --- | --- | --- | --- | --- |
|  | **SCP** | **LZS** | **WMT** | **TAU** |
| Teacher is aware of student’s participation in study: | 93% | 81% | 97% | 85% |
| Teacher selected correct intervention group: | 56% | 25% | 66% | 21% |
|  |  |  |  |  |
| **Reason for selecting group:** |  |  |  |  |
| Guessing: | 41% | 29% | 17% | 30% |
| Behavioral changes: | 33% | 16% | 31% | 9% |
| Info from student/parent: | 74% | 45% | 69% | 55% |
| **Note**: SCP = Slow Cortical Potential; LZS = Live Z-Score; WMT = Working Memory Training; TAU = Treatment-as-Usual | | | | |

| **Supplement Table S8** Number of participants reporting Adverse Events that increased to at least problematic, according to Pediatric Side Effects Checklist, by treatment group. | | | |
| --- | --- | --- | --- |
|  | **SCP (n=50)** | **LZS (n=50)** | **WMT (n=51)** |
| *Adverse Eventa* | Baseline to Posttreatment (first two weeks of treatment) | Baseline to Posttreatment (first two weeks of treatment) | Baseline to Posttreatment (first two weeks of treatment) |
| **Restlessness** | 6 (3) | 9 (8) | 11 (8) |
| **Problems falling asleep** | 10 (8) | 5 (4) | 10 (8) |
| **Concentration problems** | 5 (5) | 6 (4) | 12 (8) |
| **Sleepiness** | 6 (3) | 7 (6) | 7 (6) |
| **Irritability** | 4 (2) | 8 (5) | 6 (4) |
| **Agitated** | 2 (1) | 7 (6) | 9 (7) |
| **Memory problems** | 6 (5) | 5 (3) | 6 (4) |
| **Tiredness** | 6 (5) | 5 (3) | 4 (4) |
| **Depression** | 5 (4) | 2 (2) | 5 (4) |
| **Loss of appetite** | 2 (2) | 5 (4) | 4 (4) |
| **Headaches** | 4 (3) | 5 (4) | 2 (2) |
| **Anxiety** | 2 (1) | 4 (4) | 5 (4) |
| **Stomach issues** | 3 (3) | 3 (2) | 4 (3) |
| **Anger** | 4 (2) | 5 (3) | 1 (0) |
| **Increased appetite** | 2 (2) | 4 (3) | 2 (1) |
| **Chills** | 2 (1) | 3 (1) | 3 (3) |
| **Increased thirst** | 2 (0) | 2 (0) | 3 (2) |
| **Nightmares / vivid dreams** | 4 (4) | 2 (1) | 0 (0) |
| **Nausea** | 1 (1) | 1 (1) | 2 (2) |
| **Dizziness** | 1 (1) | 0 (0) | 3 (3) |
| **Weight loss** | 3 (1) | 1 (1) | 0 (0) |
| **Constipation** | 1 (1) | 1 (1) | 1 (1) |
| **Diarrhea** | 2 (2) | 1 (1) | 0 (0) |
| **Tremors** | 1 (1) | 0 (0) | 2 (1) |
| **Dry mouth/ dry eyes** | 1 (0) | 1 (0) | 1 (1) |
| **Speech difficulties** | 0 (0) | 1 (1) | 1 (0) |
| **Increased sweating** | 0 (0) | 2 (2) | 0 (0) |
| **Panic attacks** | 0 (0) | 0 (0) | 2 (1) |
| **Rash** | 0 (0) | 2 (2) | 0 (0) |
| **Allergic reactions** | 0 (0) | 1 (1) | 1 (0) |
| **Muscle stiffness** | 0 (0) | 1 (1) | 0 (0) |
| **Stiffness in Jaw** | 0 (0) | 0 (0) | 1 (1) |
| **Blurred vision** | 0 (0) | 0 (0) | 1 (1) |
| **Increased salivation** | 0 (0) | 1 (1) | 0 (0) |
| **Weight gain** | 0 (0) | 1 (1) | 0 (0) |
| **Breast tension** | 0 (0) | 1 (0) | 0 (0) |
| **Palpitation** | 0 (0) | 1 (0) | 0 (0) |
| **Chest pain** | 0 (0) | 0 (0) | 1 (1) |
| **Acne** | 0 (0) | 0 (0) | 1 (0) |
| **Increase urine output** | 0 (0) | 0 (0) | 1 (0) |
| **Bed wetting** | 1 (1) | 0 (0) | 0 (0) |
| **Note**. SCP = Slow Cortical Potential; LZS = Live Z-Score; WMT = Working Memory Training; TAU = Treatment-as-Usual  a Translated from Swedish version | | | |
